# Supplementary material
Source: publisher site journal article supplement (https://www.spandidos-publications.com/7133/downloadSupplementary)
Supplement: Supplementary file 1 [file downloadSupplementary]

Table SI. The parameter estimates from the regression model with their 95% confidence intervals.

|              | Control                   |                              |                              |                              |                             |                              | Epirubicin                 |                             |                             |                             |                            |                             |
|--------------|---------------------------|------------------------------|------------------------------|------------------------------|-----------------------------|------------------------------|----------------------------|-----------------------------|-----------------------------|-----------------------------|----------------------------|-----------------------------|
| Analyzed RNA | Intercept                 | BT474                        | MCF7                         | MDA-MB-231                   | SKBR-3                      | T-47D                        | BT-20                      | BT474                       | MCF7                        | MDA-MB-231                  | SKBR-3                     | T-47D                       |
| HOTAIR       | 0.03 (0.02, 0.04), P=0.00 | -0.03 (-0.05, -0.01), P=0.00 | -0.02 (-0.03, -0.00), P=0.03 | -0.03 (-0.05, -0.02), P=0.00 | -0.01 (-0.02, 0.01), P=0.30 | 0.004 (-0.01, 0.02), P=0.62  | 0.03 (0.02, 0.05), P=0.00  | 0.001 (-0.02, 0.02), P=0.92 | 0.009 (-0.01, 0.02), P=0.29 | 0.000 (-0.02, 0.02), P=0.99 | 0.084 (0.07, 0.10), P=0.00 | 0.061 (0.05, 0.08), P=0.00  |
| TERC         | 0.31 (0.201, 0.41) P=0,00 | -0.15 (-0.30, -0.01) P=0.05  | -0.23 (-0.38, -0.08) P=0.003 | -0.23 (-0.34, -0.08) P=0.003 | -0.15 (-0.30, -0.01) P=0.05 | -0.26 (-0.40, -0.11) P=0.001 | -0.06 (-0.21, 0.08) P=0.40 | -0.03 (-0.17, 0.12) P=0.73  | 0.06 (-0.08, 0.21) P=0.40   | -0.02 (-0.17, 0.12) P= 0.76 | -0.06 (-0.21, 0.09) P=0.43 | 0.02 (-0.13, 0.16) P=0.84   |
| MALAT1       | 0.57 (-1.03, 2.16) P=0.49 | 0.92 (-1.33, 3.18) P=0.42    | 4.38 (2.12, 6.63) P=0.00     | 0.31 (-1.94, 2.56) P=0.79    | -0.18 (-2.43, 2.08) P=0.88  | 3.70 (1.45, 5.95) P=0.002    | -0.01 (-2.26, 2.24) P=0.99 | 0.20 (-2.06, 2.45) P=0.87   | 1.07 (-1.18, 3.32) P=0.36   | -0.15 (-2.40, 2.11) P=0.90  | 0.17 (-2.08, 2.42) P=0.88  | -1.70 (-3.96, 0.55) P=0.143 |
| Linc312      | 0.01 (-0.02, 0.03) P=0.70 | -0.003 (-0.04, 0.03) P=0.87  | 0.04 (-0.003, 0.07) P=0.07   | -0.001 (-0.04, 0.04) P=0.98  | 0.00 (-0.04, 0.04) P=0.10   | 0.03 (-0.01, 0.06) P=0.17    | 0.01 (-0.03, 0.04) P=0.75  | 0.00 (-0.04, 0.04) P=0.98   | 0.03 (-0.01, 0.06) P=0.19   | -0.001 (-0.04, 0.04) P=0.96 | 0.00 (-0.04, 0.04) P=0.10  | 0.001 (-0.04, 0.04) P=0.95  |
| CYTOR        | 0.43 (0.31, 0.55) P=0.00  | -0.39 (-0.57, -0.22) P=0.00  | -0.33 (-0.51, -0.16) P=0.00  | 0.41 (0.23, 0.58) P=0.00     | -0.08 (-0.26, 0.09) P=0.36  | -0.39 (-0.56, -0.21) P=0.00  | 0.34 (0.17, 0.52) P=0.00   | 0.28 (0.10, 0.45) P=0.003   | 0.04 (-0.14, 0.21) P=0.66   | 0.33 (0.16, 0.51) P=0.00    | 0.16 (-0.02, 0.33) P=0.08  | 0.01 (-0.17, 0.18) P=0.94   |
| Wspar        | 0.02 (0.004, 0.03) P=0.02 |                              |                              |                              |                             |                              |                            |                             |                             |                             |                            |                             |
| BC4          | 0.04 (0.03, 0.04) P=0.00  | -0.03 (-0.04, -0.01) P=0.00  | -0.03 (-0.04, -0.02) P=0.00  |                              | -0.01 (-0.02, 0.01) P=0.335 | -0.03 (-0.04, -0.02) P=0.00  | 0.08 (0.07, 0.09) P=0.00   | 0.00 (-0.01, 0.01) P=0.72   | 0.00 (-0.01, 0.01) P=0.84   |                             | 0.02 (0.00, 0.03) P=0.01   | -0.00 (-0.01, 0.01) P=0.7   |

|         |                             |                             |                           |                               |                             |                             |                             |                              |                               |                              |                             |                               |
|---------|-----------------------------|-----------------------------|---------------------------|-------------------------------|-----------------------------|-----------------------------|-----------------------------|------------------------------|-------------------------------|------------------------------|-----------------------------|-------------------------------|
| BCAR4   | 0.002 (-0.003, 0.01) P=0.47 | -0.001 (-0.01, 0.01) P=0.83 | 0.02 (0.01, 0.02) P=0.00  | -0.001 (-0.01, 0.02) P=0.70   | 0.004 (-0.003, 0.01) P=0.30 | 0.012 (0.01, 0.02) P=0.002  | 0.002 (-0.01, 0.01) P=0.57  | 0.00 (-0.01, 0.02) P=0.91    | -0.003 (-0.01, 0.004) P=0.44  | 0.00 (-0.01, 0.01) P=0.93    | 0.001 (-0.01, 0.01) P=0.72  | 0.01 (0.002, 0.02) P=0.01     |
| CCAT2   | 0.02 (0.01, 0.03) P=0.003   |                             |                           |                               | -0.02 (-0.03, 0.002) P=0.09 | -0.02 (-0.03, 0.001) P=0.07 |                             |                              | -0.01 (-0.03, 0.01) P=0.37    |                              | -0.002 (-0.02, 0.02) P=0.83 | 0.00 (-0.02, 0.02) P=0.98     |
| NKILA   | 0.003 (-0.14, 0.15) P=0.97  | -0.002 (-0.21, 0.20) P=0.98 | 0.26 (0.05, 0.46) P=0.02  | 0.00 (-0.20, 0.20) P=1.00     | 0.002 (-0.20, 0.20) P=0.98  | 0.02 (-0.19, 0.22) P=0.88   | 0.02 (-0.19, 0.22) P=0.89   | 0.01 (-0.20, 0.21) P=0.94    | 0.88 (0.68, 1.08) P=0.0       | 0.003 (-0.20, 0.21) P=0.98   | 0.00 (-0.20, 0.20) P=1.0    | 0.01 (-0.2, 0.21) P=0.96      |
| FTX     | 0.001 (-0.002, 0.01) P=0.49 | 0.002 (-0.003, 0.01) P=0.53 | 0.02 (0.02, 0.03) P=0.00  | -0.001 (-0.01, 0.004) P=0.82  | 0.002 (-0.003, 0.01) P=0.37 | 0.00 (-0.01, 0.01) P=0.85   | 0.00 (-0.01, 0.01) P=0.90   | 0.00 (-0.01, 0.01) P=0.98    | 0.002 (-0.003, 0.01) P=0.40   | 0.00 (-0.01, 0.01) P=0.99    | 0.001 (-0.004, 0.01) P=0.64 | 0.001 (-0.004, 0.01) P=0.77   |
| JPX     | 0.01 (0.004, 0.01) P=0.00   | 0.001 (-0.002, 0.01) P=0.56 | 0.02 (0.02, 0.02) P=0.00  | -0.004 (-0.01, -0.001) P=0.02 | 0.00 (0.00, 0.01) P=0.06    | -0.003 (-0.01, 0.00) P=0.06 | -0.004 (-0.01, 0.00) P=0.04 | -0.01 (-0.01, -0.001) P=0.01 | -0.004 (-0.01, -0.001) P=0.03 | -0.001 (-0.01, 0.002) P=0.55 | -0.004 (-0.01, 0.00) P=0.04 | -0.001 (-0.004, 0.003) P=0.71 |
| Ki67    | 0.81 (0.68, 0.94) P=0.00    | -0.15 (-0.33, 0.04) P=0.13  | 0.15 (-0.04, 0.34) P=0.12 | -0.19 (-0.38, -0.003) P=0.05  | 0.26 (0.07, 0.45) P=0.01    | -0.37 (-0.56, -0.18) P=0.00 | 0.04 (-0.15, 0.23) P=0.70   | -0.28 (-0.47, -0.09) P=0.01  | -0.39 (-0.58, -0.21) P=0.00   | -0.18 (-0.37, 0.01) P=0.07   | -0.1 (-0.29, 0.09) P=0.30   | -0.08 (-0.27, 0.11) P=0.40    |
| Cycl.D1 | 0.18 (-0.57, 0.92) P=0.64   | 2.06 (1.01, 3.12) P=0.0     | 3.45 (2.4, 4.50) P=0.00   | 0.59 (-0.46, 1.65) P=0.27     | -0.16 (-1.22, 0.89) P=0.76  | 0.16 (-0.89, 1.21) P=0.77   | -0.08 (-1.13, 0.97) P=0.89  | -1.4 (-2.45, -0.35) P=0.01   | 0.38 (-0.68, 1.43) P=0.49     | -0.38 (-1.43, 0.67) P=0.48   | 0.00 (-1.05, 1.06) P=0.99   | -0.04 (-1.09, 1.01) P=0.94    |
|         | Gemcitabine                 |                             |                           |                               |                             |                             | Paclitaxel                  |                              |                               |                              |                             |                               |
|         | BT-20                       | BT474                       | MCF7                      | MDA-                          | SKBR-3                      | T-47D                       | BT-20                       | BT474                        | MCF7                          | MDA-                         | SKBR-3                      | T-47D                         |

|         |                             |                            |                             | MB-231                     |                             |                              |                            |                            |                            | MB-231                      |                             |                             |
|---------|-----------------------------|----------------------------|-----------------------------|----------------------------|-----------------------------|------------------------------|----------------------------|----------------------------|----------------------------|-----------------------------|-----------------------------|-----------------------------|
| HOTAIR  | 0.01 (-0.01, 0.03) P=0.24   | 0.001 (-0.02, 0.02) P=0.94 | 0.01 (-0.01, 0.03) P=0.21   | 0.00 (-0.02, 0.02) P=0.99  | 0.01 (-0.01, 0.03) P=0.28   | 0.01 (-0.003, 0.03) P=0.10   | 0.001 (-0.02, 0.02) P=0.93 | 0.00 (-0.02, 0.02) P=0.10  | 0.01 (-0.01, 0.03) P=0.25  | 0.00 (-0.02, 0.02) P=1.00   | -0.001 (-0.02, 0.02) P=0.95 | -0.001 (-0.02, 0.02) P=0.88 |
| TERC    | 0.05 (-0.10, 0.20) P=0.51   | -0.04 (-0.19, 0.11) P=0.62 | 0.03 (-0.12, 0.18) P=0.71   | -0.01 (-0.16, 0.14) P=0.91 | 0.05 (-0.09, 0.20) P=0.48   | 0.01 (-0.13, 0.16) P=0.86    | 0.03 (-0.12, 0.18) P=0.71  | -0.01 (-0.16, 0.14) P=0.87 | 0.03 (-0.12, 0.17) P=0.72  | 0.01 (-0.14, 0.15) P=0.93   | 0.09 (-0.06, 0.24) P=0.23   | 0.00 (-0.15, 0.15) P=0.10   |
| MALAT1  | 0.002 (-2.25, 2.26) P=0.10  | 0.35 (-1.90, 2.60) P=0.76  | 0.55 (-1.70, 2.80) P=0.63   | -0.25 (-2.50, 2.01) P=0.83 | -0.07 (-2.32, 2.19) P=0.95  | -0.70 (-2.96, 1.55) P=0.54   | -0.12 (-2.37, 2.14) P=0.92 | 0.02 (-2.23, 2.28) P=0.98  | -0.67 (-2.93, 1.58) P=0.56 | -0.21 (-2.46, 2.04) P=0.86  | -0.10 (-2.36, 2.15) P=0.93  | -0.55 (-2.80, 1.71) P=0.64  |
| Linc312 | 0.001 (-0.04, 0.04) P= 0.94 | 0.001 (-0.04, 0.04) P=0.97 | 0.006 (-0.03, 0.04) P=0.743 | -0.001(-0.04, 0.04) P=0.95 | -0.001 (-0.04, 0.04) P=0.95 | -0.01 (-0.04, 0.03) P: 0.71  | 0.00 (-0.04, 0.04) P=0.98  | 0.00 (-0.04, 0.04) P=0.98  | 0.01 (-0.03, 0.04) P=0.73  | 0.00 (-0.04,0.04) P=0.99    | -0.001(-0.04, 0.04) P=0.97  | -0.001 (-0.04, 0.04) P=0.97 |
| CYTOR   | 0.26 (0.08, 0.43) P=0.01    | 0.32 (0.15, 0.50) P=0.001  | 0.12 (-0.05, 0.30) P=0.18   | 0.04 (-0.14, 0.21) P=0.70  | 0.17 (-0.01, 0.35) P=0.06   | 0.06 (-0.11, 0.24) P=0.49    | 0.04 (-0.13, 0.22) P=0.63  | 0.001 (-0.18, 0.18) P=1.00 | 0.05 (-0.13, 0.22) P=0.61  | -0.001 (-0.18, 0.18) P=1.00 | -0.01 (-0.18, 0.17) P=0.95  | -0.002 (-0.18, 0.17) P=0.98 |
| Wspar   |                             |                            |                             |                            |                             |                              |                            |                            |                            |                             |                             |                             |
| BC4     | 0.02 (0.01, 0.03) P=0.00    | 0.00 (-0.01, 0.01) P=0.54  | 0.00 (-0.01, 0.01) 0.77     |                            | 0.01 (0.00, 0.02) P=0.03    | 0.00 (-0.01, 0.01) P=0.92    | 0.00 (-0.01, 0.01) P=0.70  | -0.00 (-0.01, 0.01) P=0.92 | 0.00 (-0.01, 0.01) P=0.91  |                             | 0.01 (-0.00, 0.02) P=0.24   | 0.00 (-0.01, 0.01) P=0.97   |
| BCAR4   | 0.00 (-0.01, 0.01) P=0.98   | 0.00 (-0.01, 0.01) P=0.91  | 0.003 (-0.004, 0.01) P=0.43 | 0.00 (-0.01, 0.01) P=0.98  | -0.002 (-0.01, 0.01) P=0.64 | -0.004 (-0.01, 0.003) P=0.28 | 0.00 (-0.01, 0.01) P=0.94  | 0.00 (-0.01, 0.01) P=0.98  | 0.002 (-0.01, 0.01) P=0.56 | 0.00 (-0.01, 0.01) P=1.0    | -0.001 (-0.01, 0.01) P=0.82 | -0.001 (-0.01, 0.01) P=0.77 |

|         |                              |                                  |                                |                                 |                                 |                                  |                                |                                 |                                  |                                 |                                 |                                |                               |
|---------|------------------------------|----------------------------------|--------------------------------|---------------------------------|---------------------------------|----------------------------------|--------------------------------|---------------------------------|----------------------------------|---------------------------------|---------------------------------|--------------------------------|-------------------------------|
| CCAT2   |                              |                                  | 0.01 (-0.01, 0.03)<br>P=0.43   |                                 | -0.003 (-0.02, 0.02)<br>P=0.77  | 0.001 (-0.02, 0.02)<br>P=0.92    |                                |                                 |                                  | -0.003 (-0.02, 0.02)<br>P=0.74  |                                 | -0.001 (-0.02, 0.02)<br>P=0.88 | 0.000 (-0.02, 0.02)<br>P=0.97 |
| NKILA   | 0.002 (-0.20, 0.20) P=0.99   | 0.003 (-0.199, 0.21)<br>P=0.98   | 0.27 (0.06, 0.47)<br>P=0.01    | -0.001 (-0.20, 0.20)<br>P=0.99  | -0.003 (-0.21, 0.20)<br>P=0.98  | -0.002 (-0.20, 0.20)<br>P=0.99   | 0.001 (-0.20, 0.20)<br>P=0.99  | 0.000 (-0.20, 0.20)<br>P=1.00   | 0.12 (-0.09, 0.32)<br>P=0.26     | 0.00 (-0.20, 0.20)<br>P=1.00    | 0.00 (-0.20, 0.20)<br>P=1.00    | -0.002 (-0.20, 0.20)<br>P=0.99 |                               |
| FTX     | 0.001 (-0.004, 0.01) P=0.79  | 0.00 (-0.01, 0.01)<br>P=0.85     | 0.001 (-0.004, 0.01)<br>P=0.70 | 0.00 (-0.01, 0.01)<br>P=0.93    | -0.001 (-0.01, 0.004)<br>P=0.78 | 0.001 (-0.004, 0.01)<br>P=0.81   | 0.00 (-0.01, 0.01)<br>P=0.86   | 0.00 (-0.01, 0.01)<br>P=0.90    | 0.01 (0.002, 0.01)<br>P=0.01     | 0.00 (-0.01, 0.01)<br>P=0.95    | 0.001 (-0.004, 0.01)<br>P=0.68  | 0.00 (-0.01, 0.01)<br>P=0.91   |                               |
| JPX     | -0.002 (-0.01, 0.002) P=0.39 | -0.001 (-0.004, 0.003)<br>P=0.65 | -0.004 (-0.01, 0.00)<br>P=0.04 | -0.001 (-0.01, 0.002)<br>P=0.56 | -0.003 (-0.01, 0.00)<br>P=0.06  | -0.001 (-0.004, 0.003)<br>P=0.67 | 0.001 (-0.003, 0.01)<br>P=0.57 | -0.003 (-0.01, 0.001)<br>P=0.11 | -0.001 (-0.004, 0.003)<br>P=0.61 | 0.000 (-0.004, 0.003)<br>P=0.91 | 0.000 (-0.004, 0.003)<br>P=0.91 | 0.00 (-0.004, 0.003)<br>P=0.95 |                               |
| Ki67    | -0.23 (-0.42, -0.04) P=0.02  | -0.31 (-0.5, -0.12)<br>P=0.00    | -0.04 (-0.22, 0.15)<br>P=0.71  | -0.22 (-0.41, -0.03)<br>P=0.03  | -0.4 (-0.59, -0.21)<br>P=0.00   | -0.01 (-0.2, 0.18)<br>P=0.91     | 0.03 (-0.16, 0.21)<br>P=0.8    | -0.14 (-0.32, 0.05)<br>P=0.16   | 0.03 (-0.16, 0.22)<br>P=0.76     | 0.00 (-0.19, 0.19)<br>P=0.98    | -0.05 (-0.24, 0.14)<br>P=0.61   | -0.01 (-0.2, 0.18)<br>P=0.93   |                               |
| Cycl.D1 | 0.00 (-1.05, 1.06) P=1.0     | -1.17 (-2.23, -0.12)<br>P=0.03   | -0.27 (-1.32, 0.78)<br>P=0.62  | -0.37 (-1.42, 0.68)<br>P=0.49   | -0.01 (-1.06, 1.05)<br>P=0.99   | -0.05 (-1.11, 1.0)<br>P=0.92     | -0.01 (-1.06, 1.04)<br>P=0.99  | -0.23 (-1.28, 0.82)<br>P=0.67   | -0.47 (-1.53, 0.58)<br>P=0.38    | 0.07 (-0.99, 1.12)<br>P=0.9     | -0.01 (-1.06, 1.05)<br>P=0.99   | -0.05 (-1.10, 1.00)<br>P=0.93  |                               |
|         | Zoledronic acid              |                                  |                                |                                 |                                 |                                  | Fulvestrant                    |                                 |                                  |                                 |                                 |                                |                               |
|         | BT-20                        | BT474                            | MCF7                           | MDA-MB-231                      | SKBR-3                          | T-47D                            | BT-20                          | BT474                           | MCF7                             | MDA-MB-231                      | SKBR-3                          | T-47D                          |                               |
| HOTAIR  | 0.00 (-0.02, 0.02) P=0.97    | 0.00 (-0.02, 0.02)<br>P=0.10     | 0.01 (-0.01, 0.03)<br>P=0.20   | 0.00 (-0.02, 0.02)<br>P=0.99    | 0.001 (-0.02, 0.02)<br>P=0.93   | -0.004 (-0.02, 0.01)<br>P=0.65   | 0.003 (-0.01, 0.02)<br>P=0.71  | 0.00 (-0.02, 0.02)<br>P=0.99    | 0.005 (-0.01, 0.02)              | 0.00 (-0.02, 0.02)<br>P=0.99    | 0.001 (-0.014, 0.02)            | -0.002 (-0.02, 0.013)          |                               |

|         |                            |                            |                             |                            |                             |                              |                            |                             |                             |                             |                             |                             |
|---------|----------------------------|----------------------------|-----------------------------|----------------------------|-----------------------------|------------------------------|----------------------------|-----------------------------|-----------------------------|-----------------------------|-----------------------------|-----------------------------|
|         |                            |                            |                             |                            |                             |                              |                            |                             | P=0.51                      |                             | P=0.87                      | P=0.77                      |
| TERC    | -0.01 (-0.16, 0.14) P=0.90 | -0.01 (-0.15, 0.14) P=0.94 | 0.04 (-0.11, 0.19) P=0.57   | 0.01 (-0.14, 0.16) P=0.92  | 0.05 (-0.10, 0.20) P=0.50   | 0.01 (-0.14, 0.16) P=0.90    | 0.01 (-0.14, 0.15) P=0.92  | 0.01 (-0.13, 0.16) P=0.86   | 0.05 (-0.10, 0.19) P=0.54   | 0.00 (-0.15, 0.15) P=0.10   | 0.07 (-0.08, 0.21) P=0.39   | 0.001 (-0.15, 0.15) P=0.99  |
| MALAT1  | -0.24 (-2.49, 2.02) P=0.84 | -0.03 (-2.29, 2.22) P=0.98 | -0.22 (-2.47, 2.04) P=0.85  | -0.19 (-2.44, 2.07) P=0.87 | -0.10 (-2.35, 2.16) P=0.93  | -0.97 (-3.22, 1.29) P=0.40   | -0.19 (-2.45, 2.06) P=0.87 | 0.03 (-2.22, 2.28) P=0.98   | -0.28 (-2.53, 1.97) P=0.81  | -0.17 (-2.42, 2.08) P=0.88  | -0.03 (-2.28, 2.23) P=0.98  | -0.83 (-3.08, 1.43) P=0.47  |
| Linc312 | 0.00 (-0.04, 0.04) P=0.99  | 0.00 (-0.04, 0.04) P=0.99  | 0.02 (-0.02, 0.05) P=0.37   | 0.00 (-0.04, 0.04) P=0.99  | -0.001 (-0.04, 0.04) P=0.95 | -0.001 (-0.04, 0.04) P=0.98  | 0.00 (-0.04, 0.04) P=0.10  | 0.00 (-0.04, 0.04) P=0.99   | 0.02 (-0.02, 0.05) P=0.43   | -0.001 (-0.04, 0.04) P=0.97 | -0.001 (-0.04, 0.04) P=0.95 | -0.01 (-0.04, 0.03) P=0.79  |
| CYTOR   | 0.02 (-0.15, 0.20) P=0.80  | 0.004 (-0.17, 0.18) P=0.97 | 0.03 (-0.15, 0.20) P=0.76   | 0.05 (-0.13, 0.22) P=0.59  | 0.02 (-0.15, 0.20) P=0.79   | -0.001 (-0.18, 0.17) P=0.99  | 0.01 (-0.16, 0.19) P=0.90  | -0.003 (-0.18, 0.17) P=0.97 | 0.01 (-0.16, 0.19) P=0.89   | -0.06 (-0.23, 0.12) P=0.52  | 0.004 (-0.17, 0.18) P=0.97  | -0.004 (-0.18, 0.17) P=0.96 |
| Wspar   |                            |                            |                             |                            |                             |                              |                            |                             |                             |                             |                             |                             |
| BC4     | -0.00 (-0.01, 0.01) P=0.57 | 0.00 (-0.01, 0.01) P=0.99  | 0.00 (-0.01, 0.01) P=0.99   |                            | 0.01 (-0.01, 0.02) P=0.28   | -0.00 (-0.01, 0.01) P=0.83   | 0.01 (-0.00, 0.02) P=0.21  | 0.00 (-0.01, 0.01) P=0.91   | 0.00 (-0.01, 0.01) P=0.86   |                             | 0.01 (-0.01, 0.02) P=0.40   | -0.00 (-0.01, 0.01) P=0.91  |
| BCAR4   | 0.001 (-0.01, 0.01) P=0.89 | 0.00 (-0.01, 0.01) P=0.98  | 0.00 (-0.01, 0.01) P=0.98   | 0.00 (-0.01, 0.01) P=0.98  | -0.001 (-0.01, 0.01) P=0.78 | -0.004 (-0.01, 0.004) P=0.33 | 0.001 (-0.01, 0.01) P=0.87 | 0.00 (-0.01, 0.01) P=1.00   | -0.001 (-0.01, 0.01) P=0.85 | 0.00 (-0.01, 0.01) P=0.95   | -0.002 (-0.01, 0.01) P=0.61 | -0.003 (-0.01, 0.01) P=0.47 |
| CCAT2   |                            |                            | -0.001 (-0.02, 0.02) P=0.90 |                            | -0.002 (-0.02, 0.02) P=0.80 | 0.00 (-0.02, 0.02) P=0.97    |                            |                             | 0.00 (-0.02, 0.02) P=0.97   |                             | -0.002 (-0.02, 0.02) P=0.85 | 0.00 (-0.02, 0.02) P=0.99   |

|         |                             |                              |                              |                             |                             |                               |                              |                              |                              |                             |                             |                               |
|---------|-----------------------------|------------------------------|------------------------------|-----------------------------|-----------------------------|-------------------------------|------------------------------|------------------------------|------------------------------|-----------------------------|-----------------------------|-------------------------------|
| NKILA   | 0.001 (-0.2, 0.20) P=0.99   | 0.00 (-0.20, 0.20) P=1.00    | 0.06 (-0.14, 0.26) P=0.56    | 0.00 (-0.20, 0.20) P=1.00   | 0.00 (-0.20, 0.20) P=1.00   | -0.003 (-0.21, 0.20) P=0.98   | 0.001 (-0.20, 0.20) P=0.99   | 0.00 (-0.20, 0.20) P=1.00    | 0.15 (-0.05, 0.6) P=5 0.14   | 0.001 (-0.20, 0.20) P=0.99  | -0.002 (-0.21, 0.20) P=0.98 | -0.002 (-0.21, 0.20) P=0.98   |
| FTX     | 0.00 (-0.01, 0.01) P=0.92   | -0.001 (-0.01, 0.004) P=0.61 | 0.001 (-0.004, 0.01) P=0.59  | 0.00 (-0.01, 0.01) P=0.92   | 0.00 (-0.01, 0.01) P=0.97   | 0.001 (-0.004, 0.001) P=0.80  | 0.00 (-0.01, 0.01) P=0.90    | -0.001 (-0.01, 0.004) P=0.71 | 0.003 (-0.002, 0.01) p 0.321 | 0.00 (-0.01, 0.01) P=0.89   | 0.001 (-0.004, 0.01) P=0.66 | 0.00 (-0.01, 0.01) P=0.99     |
| JPX     | 0.00 (-0.004, 0.004) P=0.99 | -0.001 (-0.01, 0.002) P=0.49 | -0.003 (-0.01, 0.001) P=0.15 | 0.00 (-0.004, 0.003) P=0.90 | 0.00 (-0.003, 0.004) P=0.80 | -0.001 (-0.004, 0.003) P=0.69 | 0.001 (-0.003, 0.004) P=0.71 | 0.00 (-0.004, 0.003) P=0.86  | -0.004 (-0.01, 0.00) P=0.04  | 0.00 (-0.004, 0.003) P=0.85 | 0.00 (-0.003, 0.004) P=0.79 | -0.001 (-0.004, 0.003) P=0.74 |
| Ki67    | -0.03 (-0.22, 0.16) P=0.74  | -0.02 (-0.21, 0.17) P=0.81   | -0.12 (-0.31, 0.07) P=0.23   | -0.00 (-0.19, 0.19) P=0.98  | -0.01 (-0.20, 0.18) P=0.89  | 0.02 (-0.17, 0.20) P=0.87     | 0.02 (-0.17, 0.20) P=0.87    | -0.02 (-0.21, 0.17) P=0.83   | 0.06 (-0.13, 0.25) P=0.54    | -0.03 (-0.22, 0.16) P=0.77  | -0.06 (-0.25, 0.13) P=0.56  | -0.01 (-0.2, 0.18) P=0.92     |
| Cycl.D1 | -0.04 (-1.09, 1.01) P=0.94  | -0.28 (-1.39, 0.78) P=0.61   | -0.3 (-1.35, 0.75) P=0.58    | 0.09 (-0.97, 1.14) P=0.87   | -0.01 (-1.06, 1.05) P=0.99  | 0.10 (-1.16, 0.95) P=0.85     | -0.03 (-1.08, 1.02) P=0.96   | -0.33 (-1.38, 0.72) P=0.54   | 0.06 (-0.99, 1.11) P=0.91    | 0.09 (-0.97, 1.14) P=0.87   | -0.01 (-1.06, 1.05) P=0.99  | -0.07 (-1.12, 0.98) P=0.9     |

HOTAIR, HOX transcript antisense RNA; TERC, telomerase RNA component; MALAT-1, metastasis associated lung adenocarcinoma transcript 1; CYTOR, cytoskeleton regulator RNA; WSPAR, WNT signaling pathway activating non-coding RNA; BCAR4, breast cancer antiestrogen resistance 4; CCAT2, colon cancer associated transcript 2 RNA; NKILA, NF- $\kappa$ B interacting long non-coding RNA.
